# 1 **Reckless driving: Improved phosphorous availability is a most likely important** 2 **driver and species killer in angiosperm evolution.**

3 Stefan Olsson

4 *State Key Laboratory of Ecological Pest Control for Fujian and Taiwan Crops, College of Plant Protection,*  
5 *Fujian Agriculture and Forestry University, Fujian Province, China*

## 6 **Introductory summarizing paragraph**

7 Plants show a large range of genome sizes with a more than thousand fold difference between the largest  
8 and the smallest genomes (Bennett ,M. D., 1972; Bennett, 2005; Knight, 2005; Gregory et al., 2007;  
9 Bai et al., 2012; Kelly et al., 2015). Since, 1. DNA phosphorous is a phosphorous pool not possible to  
10 recycle within the cell. 2. Carnivorous plants with very small genomes living in low phosphorous  
11 environments uses carnivory to supply phosphorous (Leushkin et al., 2013). 3. The genus *Fritillaria* with  
12 very large genomes is dependent on mycorrhiza (Wang & Qiu, 2006; Kelly et al., 2015) probably mainly for  
13 supply of P, I decided to investigate if lifestyles connected with releases from P-limitation correlate with 1C-  
14 genome sizes. For the investigation I used available lifestyle data from several websites and articles (Wang  
15 & Qiu, 2006; Lysak et al., 2008) together with the Angiosperm C-values available at Kew  
16 <http://data.kew.org/cvalues/>. Based on this analysis I suggest the following order of P restriction for  
17 genome size expansions, from the least restricted to the most restricted, for the different lifestyles: Myco-  
18 heterotrophs<Parasitic plants<Mycorrhizal plants<Non-Mycorrhizal plants<Carnivorous plants. The data  
19 further suggest that a general improved P status most likely precedes whole genome duplication events  
20 and that uneven ploidy increases are more punishing than even ploidy most probably since uneven ploidy  
21 increases cannot be followed by adaptive recombination/selection. Thus P-limitation is a likely main  
22 restraint for angiosperm evolution and genome-expansion. However, relaxing this restraint leads plants  
23 into an evolutionary dead end with large nuclei (Bennetzen & Kellogg, 1997) and high P demand.

## 24 **MAIN**

25  
26 Phosphorous is a common limiting nutrient for plant growth (Lambers & Plaxton, 2015). The, compared to  
27 other element, relatively large proportion of non-recyclable P in DNA that cannot be lowered in response to  
28 nutrient limitations in phytoplankton cells (Berdalet, Latasa & Estrada, 1994). This should restrain genome  
29 expansions in eukaryotic cells towards unnecessary large genomes. since this would limit growth and  
30 survival in natural P nutrient limiting environments since under P-limiting conditions RNA necessary for  
31 protein synthesis and growth works as a P-reservoir (Berdalet, Latasa & Estrada, 1994). A small genome  
32 should thus be advantageous under P limiting conditions. However, in plants, gene duplications and  
33 especially whole genome duplication events followed by evolving new uses for the duplicated genes are  
34 often seen as fast forward mechanism for plant evolution. Such duplications are generally followed by fast  
35 removal of duplicated genes not finding relevant functions in double copies or as new genes and the plant  
36 revert to the diploid state although traces of the gene duplication event is left in the genome (Leitch ,I. J. &  
37 Bennett ,M. D., 2004; Šmarda et al., 2013; Han et al., 2018). There is also no correlation between size of  
38 genome and phylogenetic history in severely nutrient limited karst plants (Kang, Wang & Huang, 2015)  
39 even if phosphorous limitations after whole genome expansion events can restrain plants with large

40 genomes and limit their competitiveness (Šmarda et al., 2013). However, accumulation of non-coding  
41 repeats seems to be a more common cause of genome expansion (Kelly et al., 2015), and contraction if  
42 there is a severe P-limitation (Leushkin et al., 2013; Šmarda et al., 2013). The very small genomes of  
43 carnivorous plants have normal amounts of functional genes as well as regulatory elements between genes  
44 and seem to have mechanisms actively restricting genome expansion through accumulation of repeats  
45 (Leushkin et al., 2013). Similarly, whole genome duplication events seem to have been followed by genome  
46 reductions (most probably by removing non-coding repeats) since ploidy level is inversely correlated with  
47 size of the basic genome (Leitch, I. J. & Bennett, M. D., 2004).

48  
49 Hypotheses: 1. Niche phosphorous availability constrains plant genome sizes. 2. Freed from this constrain  
50 genome expands by two processes, gene duplications and probably more frequently by accumulation of  
51 non-coding repeats. 3. Phosphorous constraints mainly favor genome contraction by removal of repeats  
52 and but also by removal of duplicated genes that has not found new functions.

53 If these hypotheses are supported plants with very large genomes should occupy niches with relaxed  
54 phosphorous limitations while plants having very small genomes should occupy niches where there are  
55 strict phosphorous limitations. There should be little correlation between genome size and evolutionary  
56 history since accumulation of non-coding repeats does not lead to speciation but a strong correlation  
57 between plant phosphorous content and genome size.

58 It is not practically possible to experimentally test drivers (causes) of evolutionary changes since that would  
59 take thousands or millions of years. But it is possible from the literature to come up with hypotheses that  
60 can be tested in already available data if that data can be re-arranged and compiled in new ways guided by  
61 the hypotheses without post-hoc hypothesis testing.

62

63 First, I collected data on different lifestyles that could be connected to different phosphorous availability.  
64 Carnivorous plants live in very phosphorous poor environments and are known to use the caught small  
65 animals to supply phosphorous (Leushkin et al., 2013). One of the main roles of the mycorrhizal symbiosis is  
66 to supply phosphorous to the plant (Smith, Anderson & Smith, 2015) and finally, plants that are parasitic on  
67 other plants as well as plants like the more or less mycoheterotrophic orchids could be expected to be  
68 least restricted in P availability. List of plant species and their genome sizes (1C values) belonging to the 5  
69 different groups were produced from the relevant references and compared (see Methods and  
70 Supplementary files **Data S1-4**).

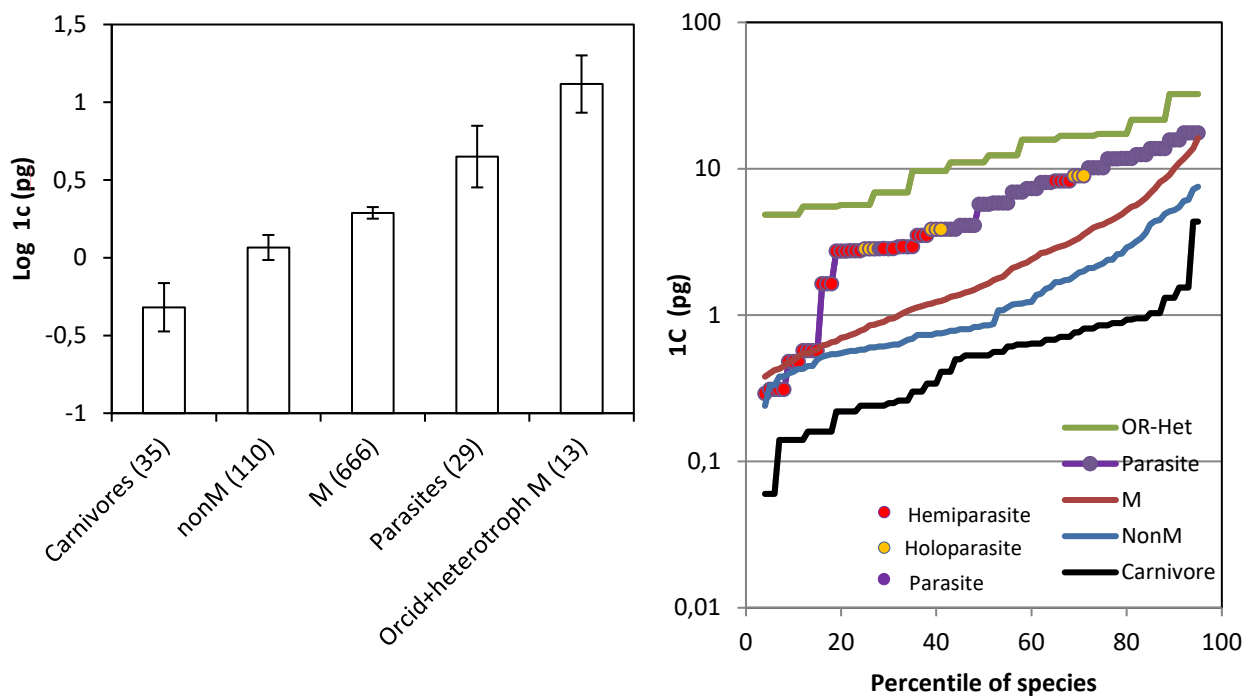

71

72 **Figure 1.** Log genome size in plants with different lifestyles Carnivores (Carnivore), non-Mycorrhizal (nonM)  
 73 Mycorrhizal (M), Parasites in other plants (Parasite) and Orchids-heterotrophic mycorrhizal (OR-Het).  
 74 Numbers in brackets represents number of plant species co-existing on lists for respective lifestyles and in  
 75 the genome size database. A. Mean values and confidence intervals. Error bars represents 95% confidence  
 76 intervals calculated using non-parametric methods to avoid assuming normal distribution. Mean values  
 77 with non-overlapping confidence intervals are significantly different ( $p < 0.05$ ). B. Sorted percentile plots  
 78 from small genome size to high genome sizes.

79

80 The data presented in **Fig. 1** lends support to the hypothesis that genome size correlates well with lifestyles  
 81 relaxed in P limitation. In addition, the sorted percentile plot (**Fig. 1B**) shows the overlap in genome sizes  
 82 between groups and also highlights the comparably low genome size for some of the parasitic plants (to the  
 83 left in **Fig. 1B**). These turns out to be mainly hemiparasites (**Fig. 1B**) and grow independently as seedlings  
 84 giving further support to the general hypothesis.

85 The phosphorous content of the seeds in combination with phosphorous demand of the plant is a  
 86 determinant for the success of plant establishment (White & Veneklaas, 2012). A perennial lifestyle can  
 87 relax the demand for phosphorous since there is less need for producing phosphorus containing seeds after  
 88 only one season. Thus, being perennial could potentially offset higher phosphorous demand due to a large  
 89 genome. Previously it has been noted that perennials have larger genome sizes in general (Bennett, M. D.,  
 90 1972) and information on perennial vs annual is also available in the Kew database on 1c sizes. I could then  
 91 compare the genome sizes for annuals vs perennials but also decided to do so for non-mycorrhizal  
 92 annuals/perennials, mycorrhizal annuals/perennials, and the strictly non-mycorrhizal family Brassicaceae  
 93 annuals/perennials (**Fig. 2A**). The previous observation (Bennett, M. D., 1972) that perennials in general  
 94 have larger genomes compared to annuals was duplicated. There was however no significant difference

95 between non-mycorrhizal plants annual vs perennial or between mycorrhizal plants annual vs perennial.  
96 This could be the result of a low sample number since only the plant species that could be included in the  
97 analysis was the ones appearing on both the mycorrhizal plant list (Wang & Qiu, 2006) and the list of  
98 annual and perennials with known 1C values (from the Kew database). The family Brassicaceae contains  
99 both annual and perennial plants and is not known to form any type of mycorrhizal symbioses so the  
100 difference in genome size connected with annual and perennial lifestyles was investigated in this family and  
101 included in **Fig. 2A** and in a **Fig. 2B**. Interestingly, the perennial Brassicaceae species with the smallest  
102 genomes are mainly endemic to the geologically young Canary Islands (Goodson, Santos-Guerra & Jansen,  
103 2006; Goodson, 2007) and belonging to genera that are otherwise mostly annual. This could possibly point  
104 to a recent shift to a perennial lifestyle (Supplementary file **Data S1**).

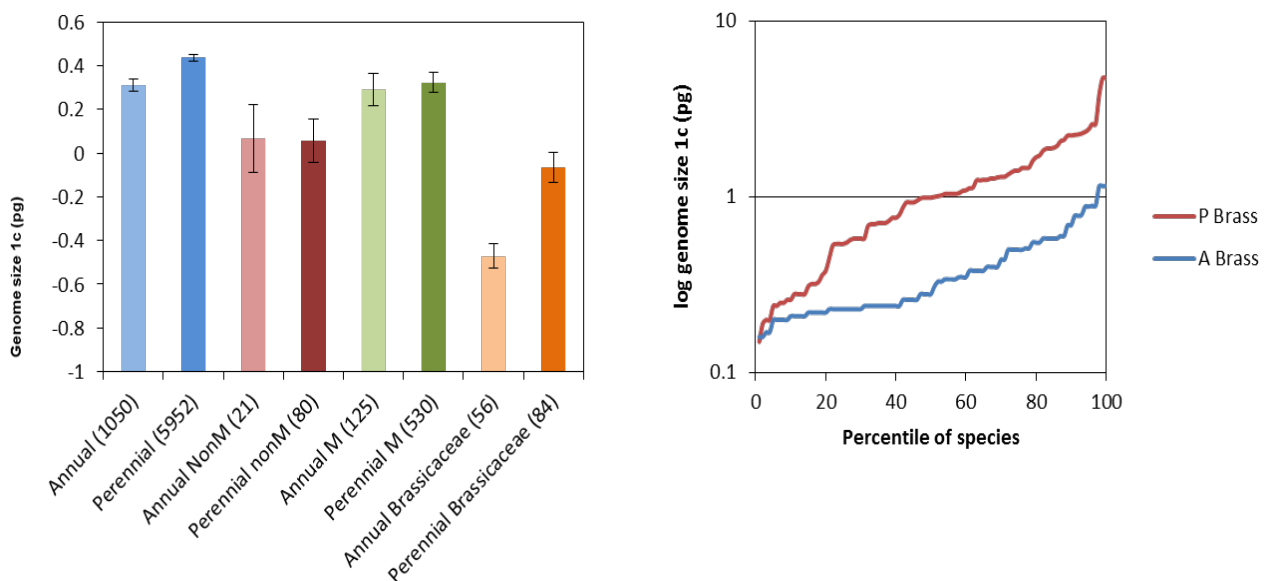

105

106

107 **Figure 2.** Log genome sizes comparisons between annuals and perennials. A. Comparisons between annuals and perennials in general (Annual, Perennial), plants with different relations to mycorrhiza (Annual NonM, Perennial NonM) and within the non-mycorrhizal family Brassicaceae (Annual Brassicaceae or A Brass, Perennial Brassicaceae or P Brass). Numbers in brackets represents number of plant species co-existing on lists for respective lifestyles and in the genome size database. Error bar represents 95% confidence intervals. Mean values with non-overlapping confidence intervals are significantly different ( $p \ll 0.05$ ). B. Sorted percentile plots from small genome size to high genome sizes for annual and perennial Brassicaceae species.

115 A multiplication of the whole genome as an increased ploidy from 2-4 should, although it could induce  
116 higher vigor, suddenly induce higher phosphorous drain from the nucleus on vital cell functions and thus a  
117 higher phosphorous demand for growth. Therefore, one can expect that a ploidy shift mainly happens for  
118 small nuclei since the stress on the phosphorous supply would be enormous and decrease plant fitness and  
119 lead to extinction even if it could be followed by a relatively fast reduction of DNA through evolution in the  
120 direction of removal of non-coding repeats (Šmarda et al., 2013). This should be reflected in an inverse  
121 relationship between n-size (genome/ploidy) and ploidy level as has been described earlier (Leitch, J. J. &

122 Bennett ,M. D., 2004). This I also found in my datasets. Even ploidy changes followed by changes in gene  
123 functions of multiplied genes followed by sexual recombination could result in better fitness and ultimately  
124 the formation of a new species (Leitch ,J. J. & Bennett ,M. D., 2004; Šmarda et al., 2013; Han et al., 2018).  
125 Thus, the punishment for a phosphorous drain by an increase in genome size should be smaller and the  
126 slope of the decrease in n-size less steep for even number ploidy levels than for odd number ploidy levels. This is  
127 also the case (**Fig. 3**), and suggests that gene diversification and speciation as well as P-stress induced  
128 relative fast genome shrinkages by a removal of repeats both relieves P-stress, weakening any potential  
129 correlation between speciation and genome size. Such a mechanism of fast removal of repeats connected  
130 with speciation due to gene duplications could explain why Kang et al. (Kang, Wang & Huang, 2015) found  
131 little phylogenetic signal correlated with genome size and P content in Karst plants while they found  
132 nitrogen content correlated with genome size and phylogeny. A better nutritional status for all nutrients  
133 except for P can be expected with evolution if P is always kept being limiting by the two mechanisms gene-  
134 duplication and accumulation of non-coding repeats.

135

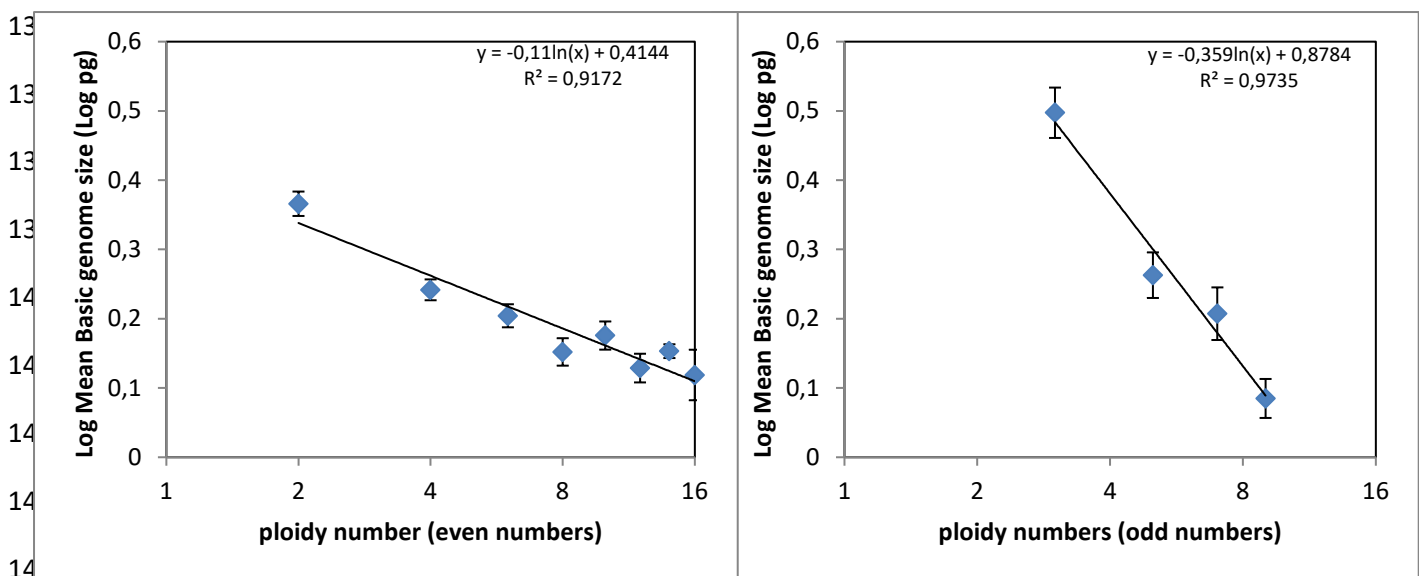

145 Figure 3. Log genome size versus log ploidy number. The basic haploid genome size decrease with higher  
146 ploidy number probably due to removal of non-coding repeats. As can be seen this removal is much weaker  
147 for plants with even ploidy numbers (left) than for odd ploidy numbers (right).

148 Because of the resulting P-stress of a whole genome duplication one can thus expect that a relaxed  
149 phosphorous limitation is needed to allow for ploidy shifts to higher ploidy levels. Since a perennial lifestyle  
150 seems to allow for larger genome sizes it should also allow for higher ploidy levels and there should thus be  
151 an overrepresentation of perennials among the plants with higher ploidy levels. If on the other hand higher  
152 ploidy levels precede development of a perennial lifestyle there should be an overrepresentation of higher  
153 ploidy levels among the annual plants. Similar reasoning can be made for ploidy and becoming mycorrhizal. I  
154 find a significant higher proportion ( $P_{\text{same}}=0.04$ ) (Fisher Exact test) of perennials to annuals ( $1493/213=6.46$ )  
155 among the higher ploidy plants ( $>2$ ) than among all plants ( $4485/816=5.50$ ) and especially compared to  
156 what is found among diploid ( $2n$ ) plants ( $2992/585=5.11$ ) ( $P_{\text{same}} =0.003$ ). This is also obvious in the

157 Brassicaceae family where the proportion of perennials to annuals in higher ploidy plants ( $>2$ ) ( $38/13=2.92$ )  
158 was found to be significantly higher ( $P_{\text{same}}=0.044$ ) than what was found in the whole family ( $69/47=1.47$ )  
159 and also significantly much higher ( $P_{\text{same}}=0.003$ ) than found in the diploid brassicas ( $31/34=0.91$ ). Thus  
160 developing a perennial lifestyle most likely precedes and allows for switching to higher ploidies. On the  
161 other hand I find no detectable significant relationships between mycorrhizal associations and ploidy level  
162 or mycorrhizal associations and perennial lifestyle in the data I have access to even if I find that the strictly  
163 non-mycorrhizal *Brassicaceae* contains significantly lower numbers ( $P_{\text{same}}=1.14E-06$ ) of perennials to  
164 annuals ( $69/47=1.47$ ) than mycorrhizal plants does ( $530/125=4.24$ ). That could indicate that the  
165 mycorrhizal lifestyle favors perennial plants since there will then be no need to establish the interaction  
166 each year. It could also reflect that being mycorrhizal was the original lifestyle of land plants (Smith,  
167 Anderson & Smith, 2015). Thus, taken together with what is presented in Figure 2A, the extra benefit in  
168 phosphorous status by being mycorrhizal seems to offset any extra benefit in phosphorous status of  
169 becoming perennial but favors becoming perennial for other reasons.

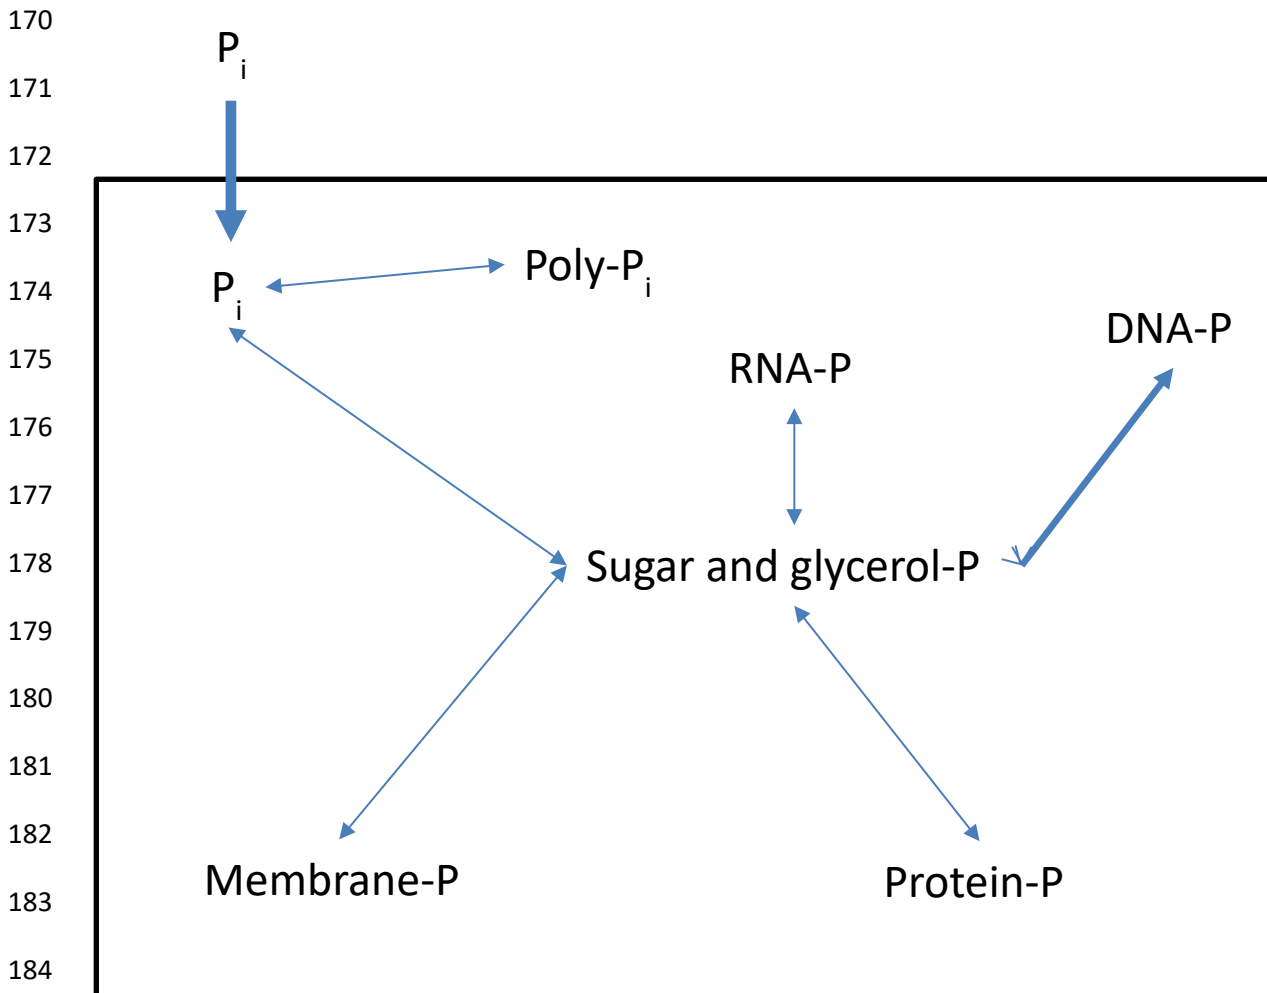

185 Figure 4. Schematic representation of the recycling and the main pools of phosphorous in a plant cell.  
186 Phosphorous taken up from the environment are distributed to different pools. DNA-P is the only large  
187 phosphorous pool in the cell that is a true sink and not possible to recycle P from for other uses without  
188 killing the cell.

189

190 Conclusion: The available data suggests that P-availability is a driving factor in plant evolution due to the  
191 fact that the genomic DNA is a major P-pool that cannot be recycled for other uses (Figure 4). External  
192 environmental changes (like for example domestication), changes in lifestyle, mutations or mycorrhizal  
193 associations that improve P-nutrition, opens a temporary window for fast evolution of new traits through  
194 gene-duplication followed by evolution of new roles for the gene products. This window of opportunity is  
195 however soon closed by accumulation of repeats so that the system again becomes P-limited. The  
196 existence of this window of opportunity is also most likely why plants have not evolved more efficient  
197 mechanisms for the immediate removal of repeats since that would also remove genes that potentially can  
198 evolve into new uses. With severe P-limitation it seems to be possible to avoid accumulation of repeats or  
199 even to remove repeats which could explain why the carnivorous plants have very small genomes although  
200 they contain roughly the same number of functional genes as other plants (Leushkin et al., 2013;  
201 Fleischmann et al., 2014; Carretero-Paulet et al., 2015). All this above could also explain why there is a  
202 faster shrinking 1c genome size with higher ploidies for the odd ploidies compared to the even ploidies.

203 **Dead end evolution:** High P availability thus gives short term gains in competitive advantage (Pandit, White  
204 & Pocock, 2014) but drives plant evolution towards large nuclei with evolutionary difficulties to switch back  
205 to growth in low P niches. Large nuclei plants are short term winners but losers of tomorrow since they (the  
206 species) and their descendants are on a one way road towards extinction. The main reservoir for the  
207 evolution of the bulk of future plant species millions of years from now are most probably found in the  
208 plants that now have small nuclei.

209

210

## 211 **Methods**

### 212 **Sources of data (See Supplementary file S1 Web resources)**

213 Data on 1C genome angiosperm C-values was downloaded from the Kew database. Information on  
214 mycorrhizal, non-mycorrhizal and myco-heterotrophic lifestyle was mainly extracted from (Wang & Qiu,  
215 2006). Information on parasitic and carnivorous lifestyles were downloaded and extracted.

### 216 **Data handling, data files and statistical programs used. (See Supplementary file S1 Web resources)**

217 MS excel was used to handle, sort and plot the data as well as for the Fisher Exact test add-in. The most  
218 important handling was to determine which plant species where on the lists for different lifestyles and on  
219 1C database list. All species occurring on both lists were included on the resulting lists so as not to  
220 introduce bias. The final Excel files used for the analysis are available in as supplementary data  
221 (**Supplementary Data S1-4**). The easy to use statistical freeware Past 3.18 was used for calculating upper  
222 and lower 95% confidence intervals using the BCa (adjusted percentile method) without assuming the  
223 distribution of the data that was not normally distributed and also for generating data for the percentile  
224 plots.

## 225 **Acknowledgements**



226 I thank Professor Bjoern Hamberger, previous colleague at University of Copenhagen , now Michigan State  
227 University, U.S.A for triggering my curiosity in finding explanations for plant genome sizes by showing me  
228 the scientific paper about the very small carnivorous plants genomes (Leushkin et al., 2013) when we were  
229 teaching a course together and for further pointing out that plants species have a very large range of  
230 genome sizes without having many more genes, something I then was not aware of. Also, a special thanks  
231 to Professor Bjoern Hamberger for good and critical discussions in the beginning of this work and for  
232 encouraging me to gather data that could be used to test my hypotheses and publish. The basic support for  
233 this work comes from my employer Fujian Agriculture and University that gives me opportunity to freely  
234 explore different research topics. Finally, I want to thank the people and funders that keep the web-  
235 resources I have used available to anyone (See **Supplementary file S1 Web resources**). Without that this  
236 work would not have been possible.

237

### 238 **Supplementary material**

239 **File S1.** List of Web-resources

### 240 **Supplementary data files available at Figshare**

241 **Data S1.** 1C genome size values, lifestyles and ploidy of Brassicaceae plants.

242 Private link: <https://figshare.com/s/e247ace54392871e8ad5>

243 DOI (reserved to be activated after manuscript acceptance): 10.6084/m9.figshare.8378414

244

245 **Data S2.** 1C genome size values, lifestyles and ploidy of carnivorous plants

246 Private link: <https://figshare.com/s/dcdd06f6641c0b643bb5>

247 DOI (reserved to be activated after manuscript acceptance): 10.6084/m9.figshare.8378474

248

249 **Data S3.** 1C genome size values, lifestyles and ploidy of mycorrhizal plants.

250 Private link: <https://figshare.com/s/1f7dc82ddcc32489d9d4>

251 DOI (reserved to be activated after manuscript acceptance): 10.6084/m9.figshare.8378477

252

253 **Data S4.** 1C genome size values, lifestyles and ploidy of parasitic plants.

254 Private link: <https://figshare.com/s/0b8ed26c18b65d786fca>

255 DOI (reserved to be activated after manuscript acceptance): 10.6084/m9.figshare.8378480



256 **References**

- 257 Bai C, Alverson WS, Follansbee A, Waller DM. 2012. New reports of nuclear DNA content for 407  
258 vascular plant taxa from the United States. *Annals of Botany* 110:1623–1629. DOI:  
259 10.1093/aob/mcs222.
- 260 Bennett MD. 2005. Nuclear DNA Amounts in Angiosperms: Progress, Problems and Prospects.  
261 *Annals of Botany* 95:45–90. DOI: 10.1093/aob/mci003.
- 262 Bennett ,M. D. 1972. Nuclear DNA Content and Minimum Generation Time in Herbaceous Plants.  
263 *Proc. Royal Soc. London. Ser. B-Biol. Sci.* 181:109–135.
- 264 Bennetzen JL, Kellogg EA. 1997. Do plants have a one-way ticket to genomic obesity? *The Plant*  
265 *Cell* 9:1509.
- 266 Berdalet E, Latasa M, Estrada M. 1994. Effects of nitrogen and phosphorus starvation on nucleic  
267 acid and protein content of *Heterocapsa* sp. *Journal of Plankton Research* 16:303–316.  
268 DOI: 10.1093/plankt/16.4.303.
- 269 Carretero-Paulet L, Librado P, Chang T-H, Ibarra-Laclette E, Herrera-Estrella L, Rozas J, Albert  
270 VA. 2015. High Gene Family Turnover Rates and Gene Space Adaptation in the Compact  
271 Genome of the Carnivorous Plant *Utricularia gibba*. *Molecular Biology and Evolution*  
272 32:1284–1295. DOI: 10.1093/molbev/msv020.
- 273 Fleischmann A, Michael TP, Rivadavia F, Sousa A, Wang W, Temsch EM, Greilhuber J, Müller  
274 KF, Heubl G. 2014. Evolution of genome size and chromosome number in the carnivorous  
275 plant genus *Genlisea* (Lentibulariaceae), with a new estimate of the minimum genome size  
276 in angiosperms. *Annals of Botany* 114:1651–1663. DOI: 10.1093/aob/mcu189.
- 277 Goodson BE. 2007. Molecular systematics and biogeography of *Descurainia* Webb &  
278 Berthel.(Brassicaceae).

- 279 Goodson BE, Santos-Guerra A, Jansen RK. 2006. Molecular Systematics of Descurainia  
280 (Brassicaceae) in the Canary Islands: Biogeographic and Taxonomic Implications. *Taxon*  
281 55:671. DOI: 10.2307/25065643.
- 282 Gregory TR, Nicol JA, Tamm H, Kullman B, Kullman K, Leitch IJ, Murray BG, Kapraun DF,  
283 Greilhuber J, Bennett MD. 2007. Eukaryotic genome size databases. *Nucleic Acids Research*  
284 35:332–338. DOI: 10.1093/nar/gkl828.
- 285 Han Y, Zhong Z, Song L, Stefan O, Wang Z, Lu G. 2018. Evolutionary analysis of plant jacalin-  
286 related lectins (JRLs) family and expression of rice JRLs in response to *Magnaporthe*  
287 *oryzae*. *Journal of Integrative Agriculture* 17:1252–1266. DOI: 10.1016/S2095-  
288 3119(17)61809-4.
- 289 Kang M, Wang J, Huang H. 2015. Nitrogen limitation as a driver of genome size evolution in a  
290 group of karst plants. *Scientific Reports* 5:11636. DOI: 10.1038/srep11636.
- 291 Kelly LJ, Renny-Byfield S, Pellicer J, Macas J, Novák P, Neumann P, Lysak MA, Day PD, Berger  
292 M, Fay MF, Nichols RA, Leitch AR, Leitch IJ. 2015. Analysis of the giant genomes of  
293 *Fritillaria* (Liliaceae) indicates that a lack of DNA removal characterizes extreme  
294 expansions in genome size. *New Phytologist* 208:596–607. DOI: 10.1111/nph.13471.
- 295 Knight CA. 2005. The Large Genome Constraint Hypothesis: Evolution, Ecology and Phenotype.  
296 *Annals of Botany* 95:177–190. DOI: 10.1093/aob/mci011.
- 297 Lambers H, Plaxton WC. 2015. Chapter 1: PHOSPHORUS: BACK TO THE ROOTS. DOI:  
298 10.13140/2.1.3795.2641.
- 299 Leitch ,I. J., Bennett ,M. D. 2004. Genome downsizing in polyploid plants. *Biological Journal Of*  
300 *The Linnean Society* 82:651–663. DOI: 10.1111/j.1095-8312.2004.00349.x.

- 301 Leushkin EV, Sutormin RA, Nabieva ER, Penin AA, Kondrashov AS, Logacheva MD. 2013. The  
302 miniature genome of a carnivorous plant *Genlisea aurea* contains a low number of genes and  
303 short non-coding sequences. *BMC genomics* 14:476.
- 304 Lysak MA, Koch MA, Beaulieu JM, Meister A, Leitch IJ. 2008. The Dynamic Ups and Downs of  
305 Genome Size Evolution in Brassicaceae. *Molecular Biology and Evolution* 26:85–98. DOI:  
306 10.1093/molbev/msn223.
- 307 Pandit MK, White SM, Pockock MJO. 2014. The contrasting effects of genome size, chromosome  
308 number and ploidy level on plant invasiveness: a global analysis. *New Phytologist* 203:697–  
309 703. DOI: 10.1111/nph.12799.
- 310 Šmarda P, Hejčman M, Březinová A, Horová L, Steigerová H, Zedek F, Bureš P, Hejčmanová P,  
311 Schellberg J. 2013. Effect of phosphorus availability on the selection of species with  
312 different ploidy levels and genome sizes in a long-term grassland fertilization experiment.  
313 *New Phytologist* 200:911–921. DOI: 10.1111/nph.12399.
- 314 Smith SE, Anderson IC, Smith FA. 2015. Mycorrhizal associations and phosphorus acquisition:  
315 From cells to ecosystems. *Annual Plant Reviews* 48:409–439. DOI:  
316 10.1002/9781110312994.apr0529.
- 317 Wang B, Qiu Y-L. 2006. Phylogenetic distribution and evolution of mycorrhizas in land plants.  
318 *Mycorrhiza* 16:299–363. DOI: 10.1007/s00572-005-0033-6.
- 319 White PJ, Veneklaas EJ. 2012. Nature and nurture: the importance of seed phosphorus content.  
320 *Plant and Soil* 357:1–8. DOI: 10.1007/s11104-012-1128-4.

321

322
